# Supplementary material
Source: PubMed Central journal article supplement (PMC5375630)
Supplement: ry161519suppa1.pdf [file ry161519suppa1.pdf]

**Table E1. Performance Benchmarks for Diagnostic Mammograms Obtained for the Additional Evaluation of a Recent Mammogram**

| Performance Measure                                   | No. of Readers Meeting Minimum Volume Requirement* | Percentiles |      |               |      |       | Acceptable Range† | Percentage of Radiologists within Acceptable Range |
|-------------------------------------------------------|----------------------------------------------------|-------------|------|---------------|------|-------|-------------------|----------------------------------------------------|
|                                                       |                                                    | 10th        | 25th | 50th (Median) | 75th | 90th  |                   |                                                    |
| Cancer detection rate (per 1000)                      | 157                                                | 20.9        | 30.3 | 45.2          | 63.2 | 74.2  | ≥20               | 91.7                                               |
| Abnormal interpretation rate (%)                      | 157                                                | 8.3         | 10.9 | 15.2          | 20.2 | 27.1  | 8–25              | 79.0                                               |
| PPV <sub>2</sub> (%)                                  | 169                                                | 16.7        | 21.2 | 28.6          | 40.3 | 48.6  | 15–40             | 69.2                                               |
| PPV <sub>3</sub> (%)                                  | 162                                                | 19.2        | 23.5 | 32.6          | 44.8 | 50.0  | 20–45             | 66.7                                               |
| False-negative rate (per 1000)                        | 157                                                | 0.0         | 1.3  | 3.8           | 6.4  | 9.7   | NA                |                                                    |
| Sensitivity (%)                                       | 126                                                | 81.8        | 86.7 | 92.7          | 96.3 | 100.0 | ≥80               | 95.2                                               |
| Specificity (%)                                       | 157                                                | 77.2        | 84.2 | 88.7          | 92.7 | 95.1  | 80–95             | 78.3                                               |
| Percentage of stage 0 or 1 cancers                    | 117                                                | 60.9        | 68.8 | 78.0          | 83.3 | 90.5  | NA                |                                                    |
| Percentage of minimal cancers                         | 115                                                | 36.4        | 44.4 | 52.9          | 63.5 | 68.4  | NA                |                                                    |
| Percentage of invasive cancers that are node negative | 106                                                | 68.0        | 76.0 | 81.5          | 86.2 | 93.8  | NA                |                                                    |
| Mean invasive cancer size (mm)                        | 107                                                | 12.4        | 14.2 | 15.7          | 18.3 | 20.4  | NA                |                                                    |

Note.—NA = not available.

\* See Materials and Methods for specific criteria for each performance measure.

† Previously published expert recommendations in Carney et al (5).

**Table E2. Performance Benchmarks for Diagnostic Mammograms Obtained for Short-Interval Follow-up**

| Performance Measure                                   | No. of Readers Meeting Minimum Volume Requirement* | Percentiles |      |               |      |      |
|-------------------------------------------------------|----------------------------------------------------|-------------|------|---------------|------|------|
|                                                       |                                                    | 10th        | 25th | 50th (Median) | 75th | 90th |
| Cancer detection rate (per 1000)                      | 116                                                | 0.0         | 6.0  | 9.5           | 14.6 | 19.3 |
| Abnormal interpretation rate (%)                      | 116                                                | 1.4         | 2.5  | 4.3           | 7.1  | 9.0  |
| PPV <sub>2</sub> (%)                                  | 73                                                 | 7.1         | 12.0 | 18.2          | 25.0 | 33.3 |
| PPV <sub>3</sub> (%)                                  | 61                                                 | 10.0        | 16.2 | 21.1          | 30.0 | 40.0 |
| False-negative rate (per 1000)                        | 116                                                | 0.0         | 2.4  | 5.9           | 9.3  | 16.3 |
| Sensitivity (%)                                       | 23                                                 | 47.8        | 53.8 | 60.0          | 70.0 | 86.7 |
| Specificity (%)                                       | 115                                                | 91.9        | 94.3 | 96.7          | 98.4 | 99.2 |
| Percentage of stage 0 or 1 cancers                    | 11                                                 | NS          | NS   | NS            | NS   | NS   |
| Percentage of minimal cancers                         | 9                                                  | NS          | NS   | NS            | NS   | NS   |
| Percentage of invasive cancers that are node negative | 1                                                  | NS          | NS   | NS            | NS   | NS   |
| Mean invasive cancer size (mm)                        | 1                                                  | NS          | NS   | NS            | NS   | NS   |

Note.—NS = not sufficient sample size to compute meaningful percentiles.

\* See Materials and Methods for specific criteria for each performance measure.

**Table E3. Performance Benchmarks for Diagnostic Mammograms Conducted for the Evaluation of a Breast Problem with a Palpable Lump Reported**

| Performance Measure                                | No. of Readers Meeting Minimum Volume Requirement* | Percentile |      |               |       |       | Acceptable Range <sup>†</sup> | Percentage of Radiologists within Acceptable Range |
|----------------------------------------------------|----------------------------------------------------|------------|------|---------------|-------|-------|-------------------------------|----------------------------------------------------|
|                                                    |                                                    | 10th       | 25th | 50th (Median) | 75th  | 90th  |                               |                                                    |
| Cancer detection rate (per 1000)                   | 87                                                 | 29.3       | 51.7 | 69.3          | 92.7  | 113.0 | ≥40                           | 87.4                                               |
| Abnormal interpretation rate (%)                   | 87                                                 | 8.2        | 14.3 | 17.1          | 21.3  | 26.4  | 10–25                         | 75.9                                               |
| PPV <sub>2</sub> (%)                               | 112                                                | 21.0       | 32.4 | 41.6          | 50.0  | 61.9  | 25–50                         | 62.5                                               |
| PPV <sub>3</sub> (%)                               | 98                                                 | 22.3       | 34.8 | 46.9          | 58.3  | 68.8  | 30–55                         | 53.1                                               |
| False-negative rate (per 1000)                     | 138                                                | 0.0        | 0.0  | 4.3           | 7.9   | 13.2  | NA                            |                                                    |
| Sensitivity (%)                                    | 76                                                 | 84.2       | 88.3 | 93.6          | 100.0 | 100.0 | ≥85                           | 89.5                                               |
| Specificity (%)                                    | 83                                                 | 81.4       | 85.7 | 89.3          | 92.6  | 95.7  | 83–95                         | 69.9                                               |
| Percentage of stage 0 or 1 cancers                 | 66                                                 | 18.2       | 23.5 | 34.9          | 45.5  | 50.0  | NA                            |                                                    |
| Percentage minimal cancers                         | 67                                                 | 0.0        | 7.7  | 15.7          | 20.0  | 27.3  | NA                            |                                                    |
| Percentage invasive cancers that are node negative | 65                                                 | 42.3       | 50.0 | 57.7          | 66.7  | 73.3  | NA                            |                                                    |
| Mean invasive cancer size (mm)                     | 64                                                 | 22.5       | 24.8 | 27.0          | 31.9  | 36.2  | NA                            |                                                    |

Note.—NA = not available.

\* See Materials and Methods for specific criteria for each performance measure.

† Previously published expert recommendations in Carney et al (5).

**Table E4. Performance Benchmarks for Diagnostic Mammograms Obtained for the Evaluation of a Breast Problem with No Lump Reported or Unknown Lump Status**

| Performance Measure                                   | No. of Readers Meeting Minimum Volume Requirement* | Percentile |      |               |      |      |
|-------------------------------------------------------|----------------------------------------------------|------------|------|---------------|------|------|
|                                                       |                                                    | 10th       | 25th | 50th (Median) | 75th | 90th |
| Cancer detection rate (per 1000)                      | 98                                                 | 8.4        | 14.9 | 25.2          | 37.6 | 53.3 |
| Abnormal interpretation rate (%)                      | 98                                                 | 3.7        | 6.2  | 8.6           | 13.0 | 16.5 |
| PPV <sub>2</sub> (%)                                  | 96                                                 | 15.8       | 20.0 | 28.0          | 40.0 | 54.2 |
| PPV <sub>3</sub> (%)                                  | 77                                                 | 20.0       | 25.0 | 31.3          | 43.5 | 61.7 |
| False-negative rate (per 1000)                        | 98                                                 | 0.0        | 2.8  | 5.0           | 8.3  | 11.6 |
| Sensitivity (%)                                       | 52                                                 | 73.3       | 77.0 | 84.6          | 90.8 | 94.4 |
| Specificity (%)                                       | 98                                                 | 87.4       | 91.1 | 93.5          | 96.1 | 98.1 |
| Percentage of stage 0 or 1 cancers                    | 41                                                 | 20.0       | 32.6 | 50.0          | 57.1 | 70.3 |
| Percentage of minimal cancers                         | 40                                                 | 9.4        | 14.8 | 24.6          | 41.4 | 49.7 |
| Percentage of invasive cancers that are node negative | 38                                                 | 41.2       | 50.0 | 64.8          | 73.7 | 80.0 |
| Mean invasive cancer size (mm)                        | 38                                                 | 19.3       | 20.9 | 25.9          | 32.4 | 35.1 |

\* See Materials and Methods for specific criteria for each performance measure.
